# Supplementary material
Source: PubMed Central journal article supplement (PMC8034818)
Supplement: NIHMS1688204-supplement-Supplement.pdf [file NIHMS1688204-supplement-Supplement.pdf]

# Supporting Information

## **Structural Determination of a Filamentous Chaperone to Fabricate Electronically Conductive Metalloprotein Nanowires**

Yun X. Chen<sup>1</sup>, Nicole L. Ing<sup>2</sup>, Fengbin Wang<sup>3</sup>, Dawei Xu<sup>4</sup>, Nancy B. Sloan<sup>4</sup>, Nga T. Lam<sup>1</sup>, Daniel L. Winter<sup>1</sup>, Edward H. Egelman<sup>3</sup>, Allon I. Hochbaum<sup>2,5,6</sup>, Douglas S. Clark<sup>4,7</sup>, and Dominic J. Glover<sup>1\*</sup>

<sup>1</sup>School of Biotechnology and Biomolecular Sciences, University of New South Wales, Sydney, NSW 2052, Australia

<sup>2</sup>Department of Materials Science and Engineering, University of California, Irvine, CA 92697, USA

<sup>3</sup>Department of Biochemistry and Molecular Genetics, University of Virginia, Charlottesville, VA 22908, USA

<sup>4</sup>Department of Chemical and Biomolecular Engineering, University of California, Berkeley, CA 94720, USA

<sup>5</sup>Department of Chemistry, University of California, Irvine, CA 92697, USA

<sup>6</sup>Department of Chemical and Biomolecular Engineering, University of California, Irvine, CA 92697, USA

<sup>7</sup>Molecular Biophysics and Integrated Bioimaging Division, Lawrence Berkeley National Laboratory, 1 Cyclotron Road, Berkeley, CA 94720, USA

## Table of Contents

|                                                                                               | <b>Page No.</b> |
|-----------------------------------------------------------------------------------------------|-----------------|
| <b>Supporting Figures</b>                                                                     |                 |
| <b>Figure S1</b> Power spectrum generated from overlapping segments of $\gamma$ PFD           | <b>3</b>        |
| <b>Figure S2</b> Fourier shell correlation between the atomic model and the cryo-EM map       | <b>4</b>        |
| <b>Figure S3</b> Proposed spatial alignment of hemes in $\gamma$ PFD-metalloprotein nanowires | <b>5</b>        |
| <b>Figure S4</b> SDS-PAGE of cytc3-SpyCatcher conjugation to $\gamma$ PFD-SpyTag              | <b>6</b>        |
| <b>Figure S5</b> Distribution of $\gamma$ PFD-metalloprotein nanowire lengths                 | <b>7</b>        |
| <b>Figure S6</b> Atomic force microscopy (AFM) imaging of the metalloprotein nanowires        | <b>8</b>        |
| <b>Figure S7</b> Solid-state conductance measurements of nanowires                            | <b>9</b>        |
| <b>Figure S8</b> Cyclic voltammogram of $\gamma$ PFD-cytc3 films                              | <b>10</b>       |
| <b>Figure S9</b> Individual cyclic voltammograms and bipotentiostat scans                     | <b>11</b>       |
| <b>Supporting Tables</b>                                                                      |                 |
| <b>Table S1</b> Refinement statistics for the $\gamma$ PFD filament model                     | <b>12</b>       |
| <b>Table S2</b> Amino acid sequence of $\gamma$ PFD and designed proteins                     | <b>13</b>       |

## Supporting Figures

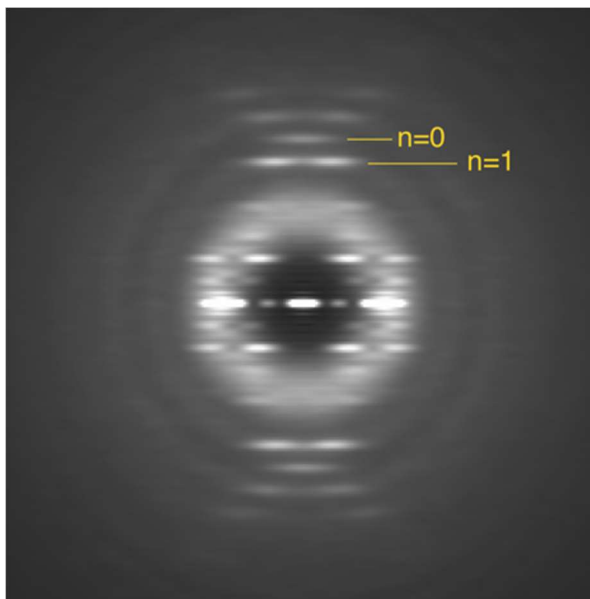

**Figure S1.** A power spectrum generated from approximately 17,000 overlapping segments of  $\gamma$ PFD. The n=0 layer line is at a height of  $1/(18 \text{ \AA})$ .

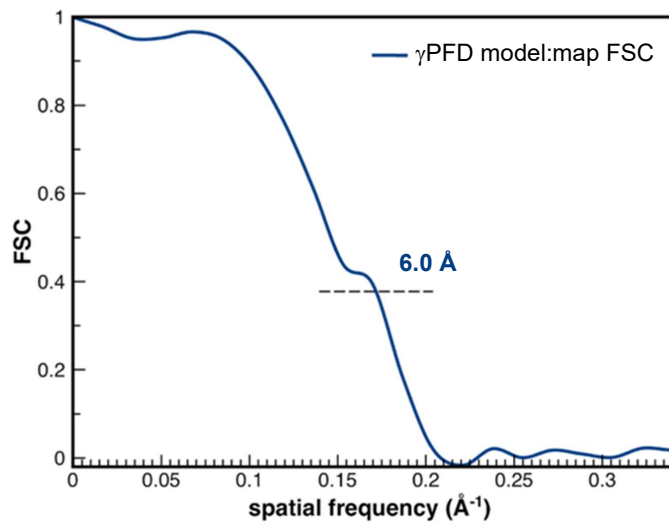

**Figure S2.** The Fourier shell correlation between the atomic model and the cryo-EM map. The estimated map resolution is 6.0 Å.

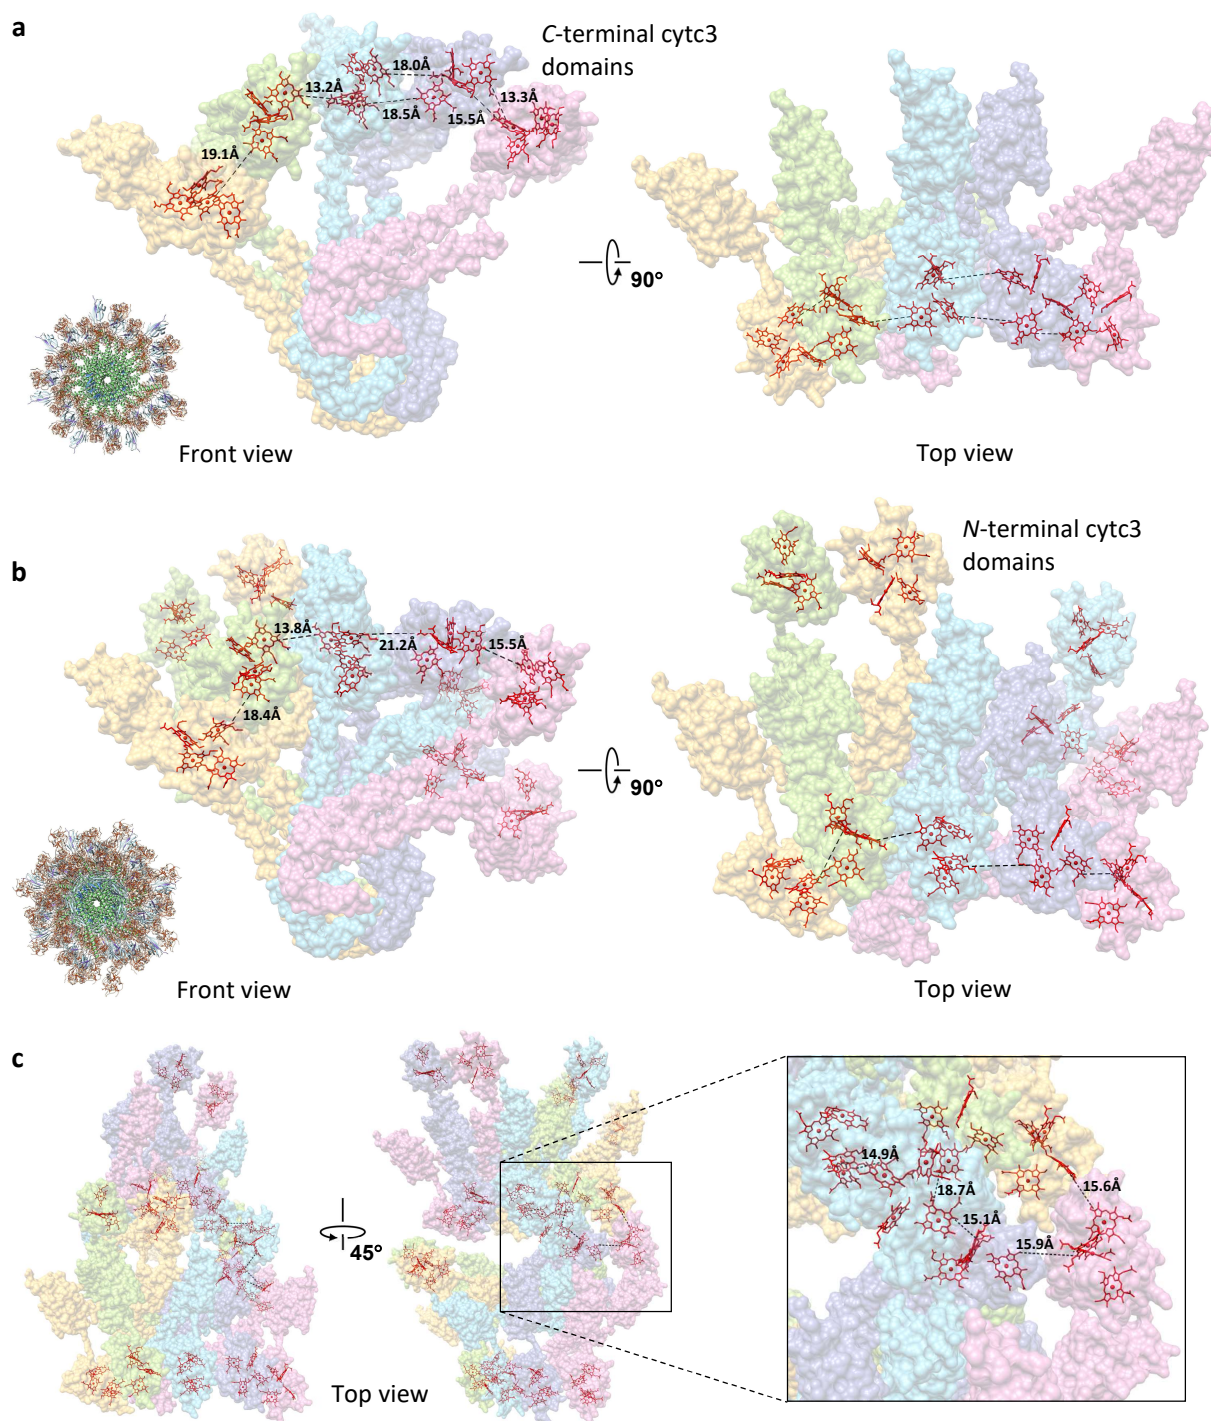

**Figure S3.** Proposed spatial alignment of hemes in  $\gamma$ PFD-metalloprotein nanowires. Minimum observed edge-to-edge distances indicated between the hemes of the C-terminal cytochrome c (cytc3) domains of five subunits of the **a**)  $\gamma$ PFD-cytc3 and **b**)  $\gamma$ PFD-[cytc3]<sub>2</sub> nanowires. The helical filament assembly results in a helical alignment of hemes along the length of the nanowire. **c**) The spatial alignment of N-terminal and C-terminal cytc3 heme domains within the  $\gamma$ PFD-[cytc3]<sub>2</sub> nanowire. The five  $\gamma$ PFD-[cytc3]<sub>2</sub> in **b** are shown with five additional subunits that are further along the filament. The minimum observed edge-to-edge distances indicated between hemes of C-terminal cytc3 domains and hemes of N-terminal cytc3 domains of adjacent subunits. Most of the helical-aligned subunits are hidden for clarity.

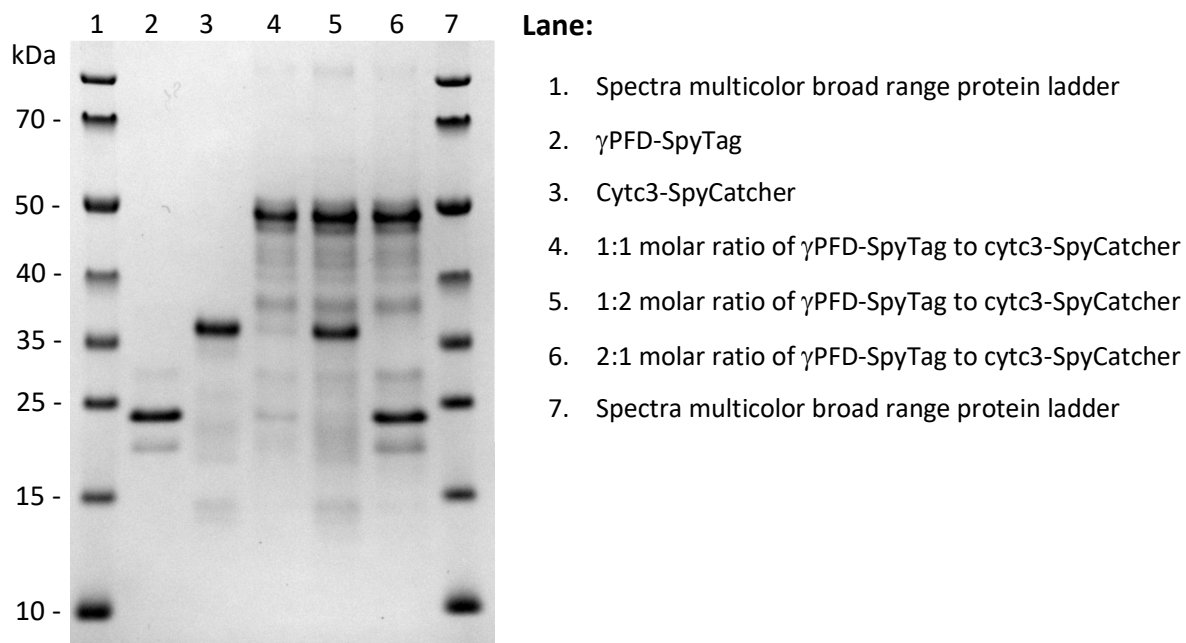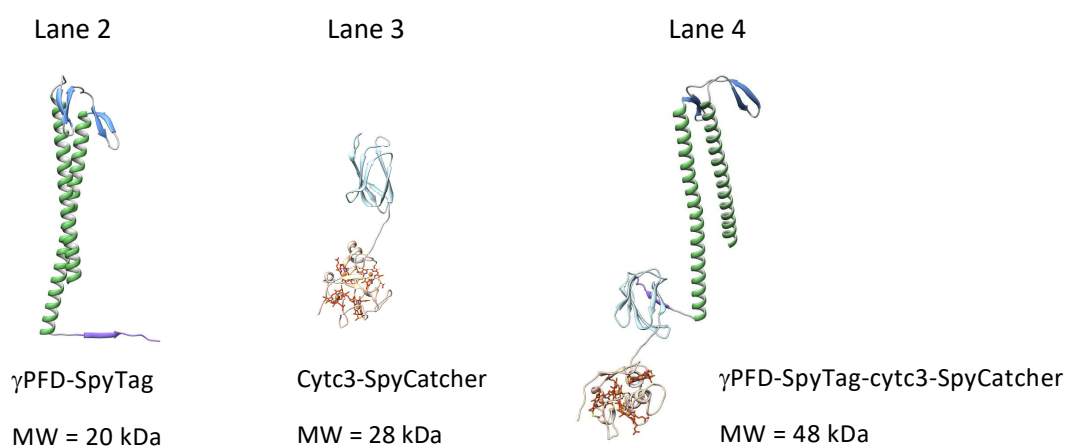

**Figure S4.** SDS-PAGE gel showing the conjugation of cytc3-SpyCatcher subunits to  $\gamma$ PFD-SpyTag at varying molar ratios. At a molar ratio of 1:1 of  $\gamma$ PFD-SpyTag to cytc3-SpyCatcher a conjugation product was observed at the expected 48 kDa size. Protein models are included below the gel to represent the expected protein contents in lanes 2-4.

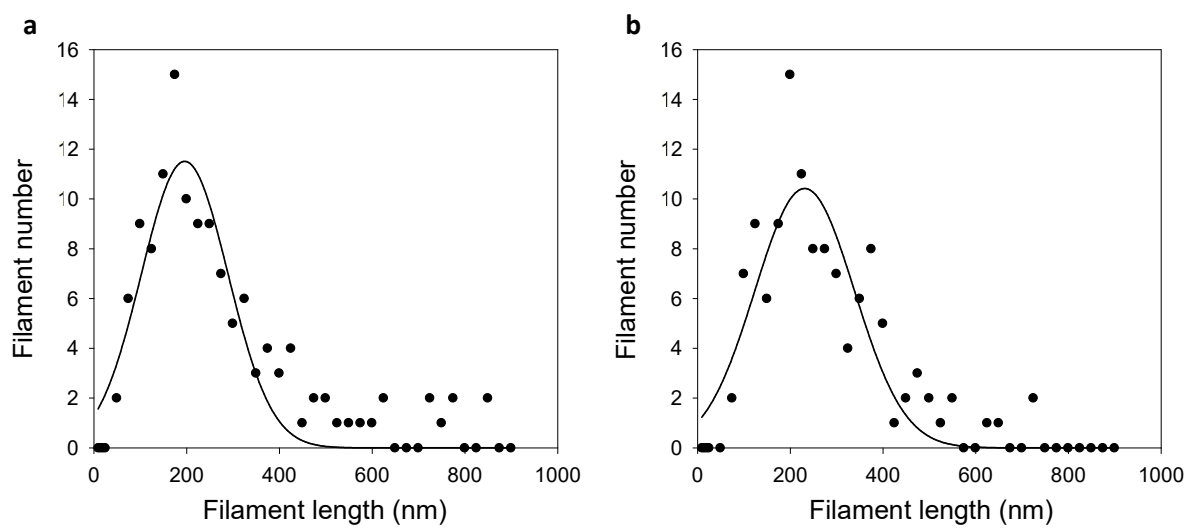

**Figure S5.** Distribution of  $\gamma$ PFD-metalloprotein nanowires lengths. The length of **a)**  $\gamma$ PFD-cytc3 and **b)**  $\gamma$ PFD-[cytc3]<sub>2</sub> nanowires were measured in digitized TEM images and plotted as distribution. ( $n = 130$  nanowires).

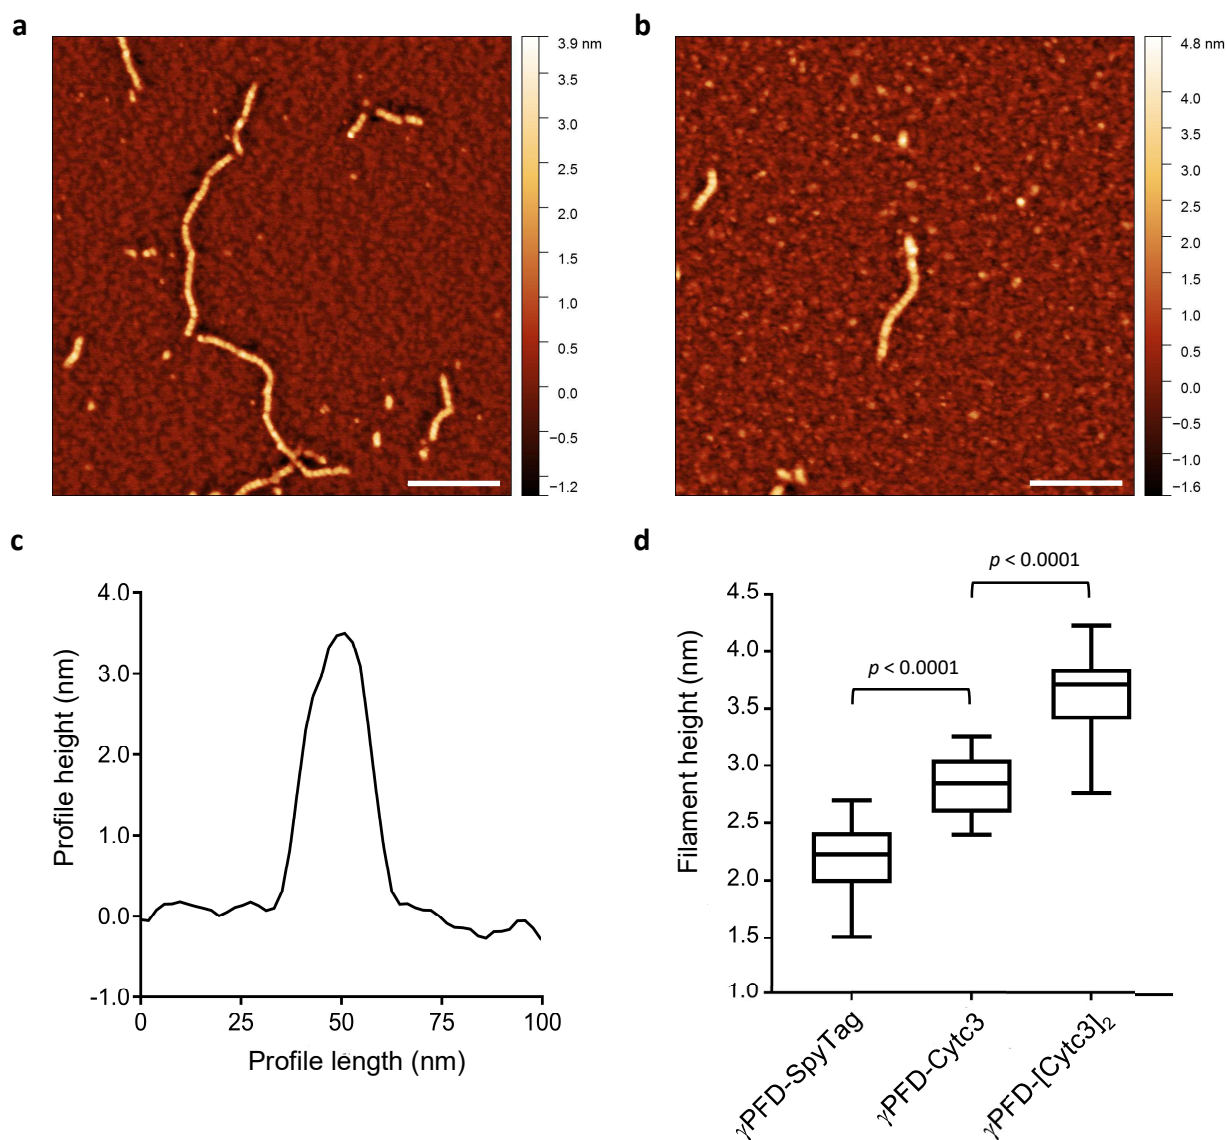

**Figure S6.** Atomic force microscopy (AFM) imaging of the metalloprotein nanowires. AFM images of **a)**  $\gamma$ PFD-cytc3 and **b)**  $\gamma$ PFD-[cytc3]<sub>2</sub> nanowires. Both scale bars = 200 nm. **c)** Z-height line-scan across the diameter of a  $\gamma$ PFD-cytc3 nanowire. **d)** Z-height distributions of  $\gamma$ PFD-SpyTag filaments, and  $\gamma$ PFD-cytc3 and  $\gamma$ PFD-[cytc3]<sub>2</sub> nanowires. The box-and-whisker plot showing the percentiles and median of filament and nanowire heights ( $n = 30$ ). The ends of the boxes define the 25<sup>th</sup> and 75<sup>th</sup> percentiles, with the line at the median, and error bars defining the 10<sup>th</sup> and 90<sup>th</sup> percentiles. Statistical significance of the mean heights was calculated using the unpaired t-test.



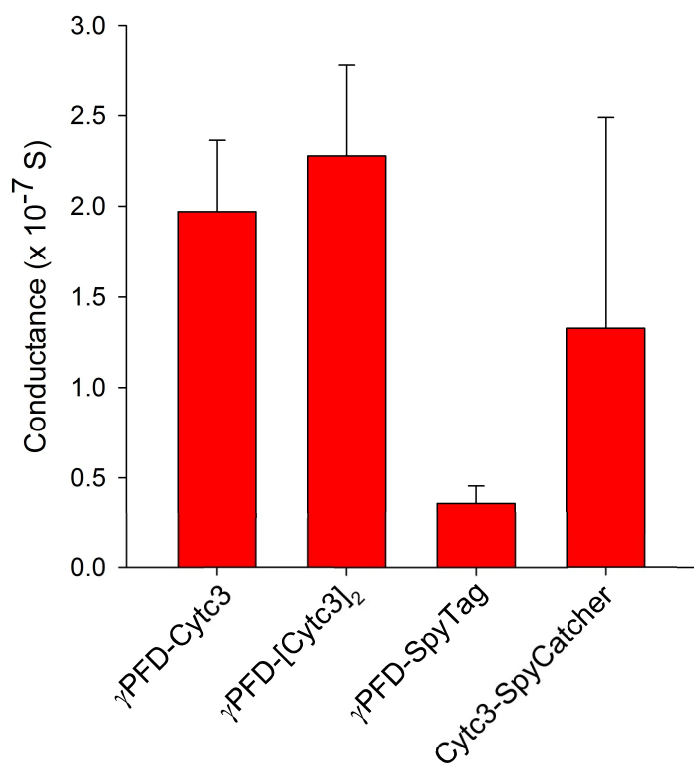

**Figure S7.** Solid-state conductance measurements of  $\gamma$ PFD-cytc3 and  $\gamma$ PFD-[cytc3]<sub>2</sub> nanowires, and the nanowires individual subunits,  $\gamma$ PFD-SpyTag and cytc3-SpyCatcher. Error bars represent standard error of films cast on separate devices ( $n = 3$ ).

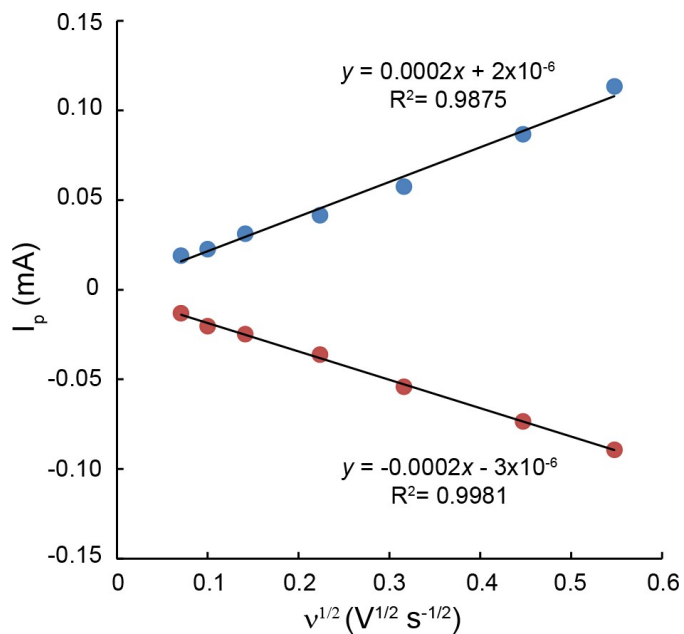

**Figure S8.** Scan rate analysis of cyclic voltammograms of a representative  $\gamma$ PFD-cytc3 film deposited on an IDE device, spanning the source and drain electrodes. Peak current ( $I_p$ ) values correspond to the peak redox current measured between the source and Pt counter (red) and drain and Pt counter (blue). The potential at the source and drain is swept with respect to an Ag/AgCl reference electrode, with a fixed potential offset  $V_{DS}$  maintained between the source and drain working electrodes. The peak current of both electrodes is proportional to the scan rate.

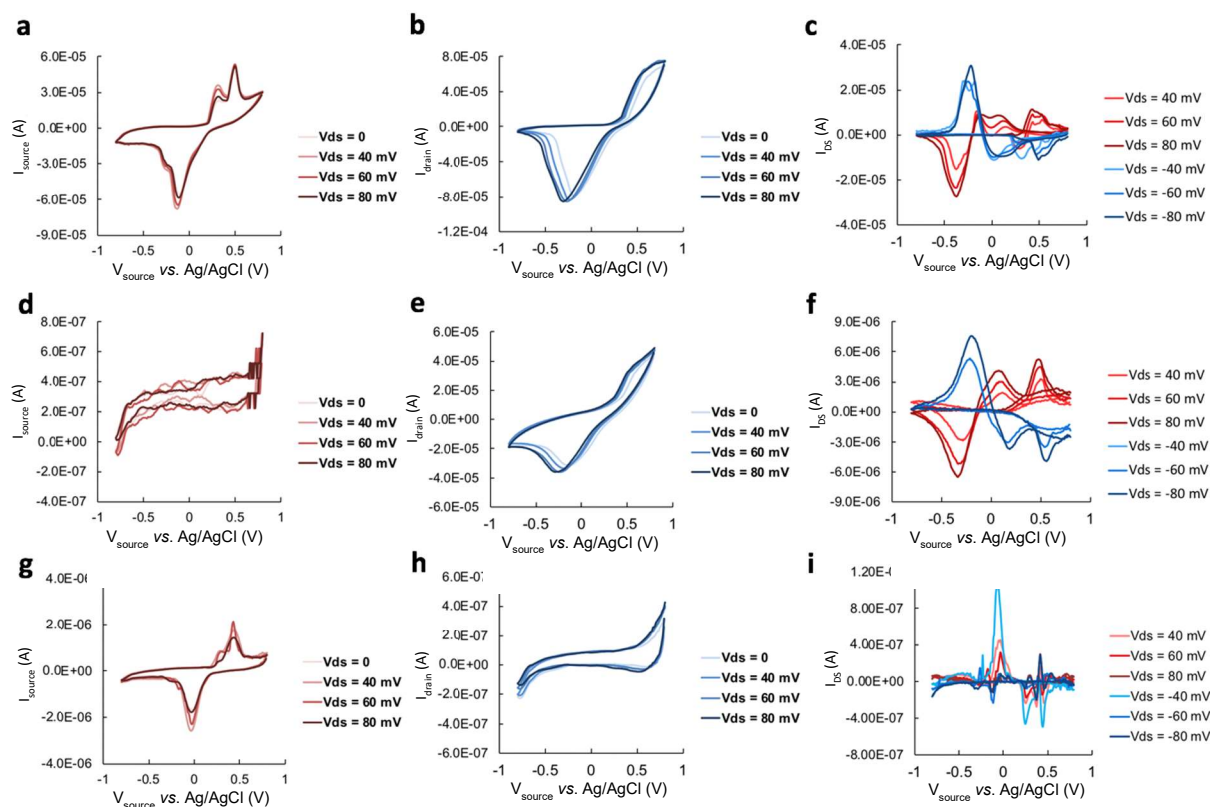

**Figure S9.** Individual CVs and full (anodic and cathodic) bipotentiostat scans for (a, b, c)  $\gamma$ PFD-cytc3, (d, e, f) cytc3-SpyCatcher, and (g, h, i)  $\gamma$ PFD-SpyTag films. Raw source (a, d, g) and drain (b, e, h) CVs at various  $V_{DS}$  values reveal distinct redox peaks. Asymmetry in between the source and drain CVs reflects inhomogeneity of film morphology across the device. Since both cytc3 and fibers are short compared to the spacing between electrodes in nature, drying effects may be causing film deposition changes across the deposition spot, affecting percolation network connections. These differences can be normalized by subtracting the values at  $V_{DS} = 0$ . Subtracting the background-subtracted source and drain currents and halving the difference produces bipotentiostat curves (c, f, i).

## Supporting Tables

**Table S1.** Refinement statistics for the  $\gamma$ PFD filament model

|                                 | $\gamma$ PFD model |
|---------------------------------|--------------------|
| <b>Helical symmetry</b>         |                    |
| Rise (Å)                        | 18.27              |
| Rotation (°)                    | -48.93             |
| <b>Resolution estimates (Å)</b> |                    |
| model:map FSC (0.143/0.38/0.5)  | 5.3/6.0/6.9        |
| “gold”-standard FSC (0.143)     | 6.1                |
| d <sub>99</sub>                 | 6.1                |
| <b>Model vs. Data CC</b>        | 0.88               |
| <b>Clash score, all atoms</b>   | 6.03               |
| <b>Protein geometry</b>         |                    |
| Ramachandran favored (%)        | 91.4               |
| Ramachandran outliers (%)       | 0                  |
| Rotamer outliers (%)            | 0                  |
| C $\beta$ deviations > 0.25 Å   | 0                  |
| <b>RMS deviations</b>           |                    |
| Bond (Å)                        | 0.004              |
| Angles (°)                      | 0.888              |
| <b>Molprobit score</b>          | 1.84               |
| <b>PDB ID</b>                   | 6VY1               |
| <b>EMDB ID</b>                  | EMD-21455          |

**Table S2.** Amino acid sequence of  $\gamma$ PFD and designed proteins

| <b>Protein</b>                              | <b>Amino acid sequence</b>                                                                                                                                                                                                                                                                        |
|---------------------------------------------|---------------------------------------------------------------------------------------------------------------------------------------------------------------------------------------------------------------------------------------------------------------------------------------------------|
| <i><math>\gamma</math>PFD</i>               | MVNEVIDINEAVRAYIAQIEGLRAEIGRLDATIATLRQSLATLKSLKTLGEGKTVLV<br>PVGSIQVEMKVEKMDKVVVSVGQNISAELEYEEALKYIEDEIKLLTFRLVLEQA<br>IAELYAKIEDLIAEAQQTSEEEKAEENEKAE                                                                                                                                            |
| <i><math>\gamma</math>PFD-SpyTag</i>        | MGHHHHHHENLYFQGGGSMVNEVIDINEAVRAYIAQIEGLRAEIGRLDATIATL<br>RQSLATLKSLKTLGEGKTVLVPVGSIAQVEMKVEKMDKVVVSVGQNISAELEYEE<br>ALKYIEDEIKLLTFRLVLEQAIAELYAKIEDLIAEAQQTSEEEKAEENEKAE<br>GSAHIVMVDAYKPTK                                                                                                      |
| <i>SpyTag-<math>\gamma</math>PFD-SpyTag</i> | MGHHHHHHENLYFQGGGSAHIVMVDAYKPTKGGGSMVNEVIDINEAVRAYIA<br>QIEGLRAEIGRLDATIATLRQSLATLKSLKTLGEGKTVLVPVGSIAQVEMKVEKMD<br>KVVVSVGQNISAELEYEEALKYIEDEIKLLTFRLVLEQAIAELYAKIEDLIAEAQQT<br>SEEEKAEENEKAE<br>GGGSAHIVMVDAYKPTK                                                                               |
| <i>Cytc3-SpyCatcher</i>                     | MKKTAAIAVALAGFATVAQAGGGSKKMFLTGVLALAVAIAMPALAAAPKAPA<br>DGLKMDKTKQPVFNHSTHKAVKCGDCHHPVNGKEDYQKCATAGCHDNMD<br>KKDKSAKGYHAMHDKGTFKSCVCHLETAGADA<br>AKKELTGCKGSKCHSGG<br>GSVDTLSGLSSEQGQSGDMTIEEDSATHIKFSKRDEDGKELAGATMELRDSSGK<br>TISTWISDGQVKDFYLYPGKYTFVETAAPDGYEVATAITFTVNEQQQVTVNGKA<br>TKGDAHI |
